# Supplementary material for: Giant single-crystal-to-single-crystal transformations associated with chiral interconversion induced by elimination of chelating ligands
Source: PubMed Central journal article supplement (PMC8616912; doi:10.1038/s41467-021-27282-9), 2021-11-25
Supplement: 41467_2021_27282_MOESM1_ESM.pdf [file 41467_2021_27282_MOESM1_ESM.pdf]

Supplementary Information for:

**Giant single-crystal-to-single-crystal transformations associated with chiral interconversion induced by elimination of chelating ligands**

Yun Li<sup>1</sup>, Bo Zhao<sup>1</sup>, Jin-Peng Xue<sup>1</sup>, Jing Xie<sup>1</sup>, Zi-Shuo Yao<sup>1\*</sup>, Jun Tao<sup>1\*</sup>

<sup>1</sup>Key Laboratory of Cluster Science of Ministry of Education, School of Chemistry and Chemical Engineering, Beijing Institute of Technology, Beijing 100081, People's Republic of China.

# Table of Contents

|                                                                                                                                                                                                                      |     |
|----------------------------------------------------------------------------------------------------------------------------------------------------------------------------------------------------------------------|-----|
| <b>Supplementary Methods</b> .....                                                                                                                                                                                   | S4  |
| Single crystal X-ray diffraction (SXR).....                                                                                                                                                                          | S4  |
| Powder X-ray diffraction (PXRD) .....                                                                                                                                                                                | S4  |
| Theoretical calculations.....                                                                                                                                                                                        | S4  |
| <b>Supplementary Table 1.</b> Crystal data of <b>1-0D</b> , <b>1-1D</b> , <b>1-3D</b> , and <b>1-0D</b> (regained).....                                                                                              | S6  |
| <b>Supplementary Table 2.</b> The volumetric shrinkage and weight loss in typical crystalline materials that undergoes reversible solid-state transformations.....                                                   | S7  |
| <b>Supplementary Fig. 1.</b> The complex cation of $[\text{Zn}^{\text{II}}(\text{eg})_3]^{2+}$ in $\Lambda$ and $\Delta$ configuration. ....                                                                         | S8  |
| <b>Supplementary Fig. 2.</b> The strong hydrogen bond interactions between the complex cation and sulfates in the compound of <b>1-0D</b> . ....                                                                     | S9  |
| <b>Supplementary Table 3.</b> Distance (Å) and angles (°) of the O–H···O hydrogen bonds in <b>1-0D</b> .<br>.....                                                                                                    | S9  |
| <b>Supplementary Fig. 3.</b> The TG curve of compound <b>1-0D</b> at different heating rates. ....                                                                                                                   | S10 |
| <b>Supplementary Fig. 4.</b> The time-lapse photographs of the crystals before, during and after the transformations from <b>1-0D</b> to <b>1-1D</b> , and further to <b>1-3D</b> . ....                             | S11 |
| <b>Supplementary Fig. 5.</b> The large single crystal of <b>1-1D</b> prepared by heating <b>1-0D</b> at 366 K for 2 h.....                                                                                           | S12 |
| <b>Supplementary Fig. 6.</b> The strong hydrogen bond interactions between the complex cation and sulfates in the compound of <b>1-1D</b> . ....                                                                     | S13 |
| <b>Supplementary Table 4.</b> Distance (Å) and angles (°) of the O–H···O hydrogen bonds in <b>1-1D</b> .<br>.....                                                                                                    | S13 |
| <b>Supplementary Fig. 7.</b> The helices with opposite handedness in the racemic crystals of <b>1-1D</b> . The helices in each individual single crystal manifest the same handedness. ....                          | S14 |
| <b>Supplementary Fig. 8.</b> The twisted $\Lambda$ conformation of complex cations in the <b>1-0D</b> are converted into identical <i>cis</i> - $\Delta$ configuration in the <b>1-1D</b> with left handedness. .... | S15 |
| <b>Supplementary Fig. 9.</b> The strong hydrogen bond interactions between the complex cation and                                                                                                                    |     |

|                                                                                                                                                                                                       |     |
|-------------------------------------------------------------------------------------------------------------------------------------------------------------------------------------------------------|-----|
| sulfates in the compound of <b>1-3D</b> . .....                                                                                                                                                       | S16 |
| <b>Supplementary Table 5.</b> Distance (Å) and angles (°) of the O–H···O hydrogen bonds in <b>1-3D</b> .<br>.....                                                                                     | S16 |
| <b>Supplementary Fig. 10.</b> The reversibility of <b>1-3D</b> to <b>1-1D</b> and further to <b>1-0D</b> monitored by<br>the in-situ PXRD. ....                                                       | S17 |
| <b>Supplementary Fig. 11.</b> The CD spectra of individual single crystals and powder crystals.<br>.....                                                                                              | S18 |
| <b>Supplementary Fig. 12.</b> The face index of single crystal of <b>1-0D</b> (left) and <b>1-1D</b> (right)<br>performed on the same single crystal. ....                                            | S19 |
| <b>Supplementary Fig. 13.</b> The competition between the left- and right- handedness during the<br>structural contraction leads to the single crystals of <b>1-1D</b> with racemic structures. ....  | S20 |
| <b>Supplementary Fig. 14.</b> Proposed mechanism for <b>1-1D</b> (a) to <b>1-3D</b> (b). ....                                                                                                         | S21 |
| <b>Supplementary Table 6.</b> Crystal data of $[\text{Co}^{\text{II}}(\text{eg})_3]\text{SO}_4$ and $[\text{Co}^{\text{II}}(\text{eg})_2(\mu\text{-SO}_4)]_n$ . ....                                  | S22 |
| <b>Supplementary Fig. 15.</b> The TG curve of compound $[\text{Co}^{\text{II}}(\text{eg})_3]\text{SO}_4$ . ....                                                                                       | S23 |
| <b>Supplementary Fig. 16.</b> The structural transformation of 0D $[\text{Co}^{\text{II}}(\text{eg})_3]\text{SO}_4$ to 1D<br>$\{[\text{Co}^{\text{II}}(\text{eg})_2(\mu\text{-SO}_4)_2]_n\}$ . ....   | S24 |
| <b>Supplementary Table 7.</b> Crystal data of $[\text{Cu}^{\text{II}}(\text{eg})_3]\text{SO}_4$ and $\{[\text{Cu}^{\text{II}}(\text{eg})_2(\mu\text{-SO}_4)_2]_n\}$ . ....                            | S25 |
| <b>Supplementary Fig. 17.</b> The TG curve of compound $[\text{Cu}^{\text{II}}(\text{eg})_3]\text{SO}_4$ . ....                                                                                       | S26 |
| <b>Supplementary Fig. 18.</b> The building block in 0D $[\text{Cu}^{\text{II}}(\text{eg})_3]\text{SO}_4$ (a) and 1D $\{[\text{Cu}^{\text{II}}(\text{eg})_2(\mu\text{-SO}_4)_2]_n\}$<br>(b). ....      | S27 |
| <b>Supplementary Fig. 19.</b> The structural transformation from 0D $[\text{Cu}^{\text{II}}(\text{eg})_3]\text{SO}_4$ to 1D<br>$\{[\text{Cu}^{\text{II}}(\text{eg})_2(\mu\text{-SO}_4)_2]_n\}$ . .... | S28 |
| <b>Supplementary Table 8.</b> Comparison between experimental (exp.) and calculated (calc.) lattice<br>parameters of the structures from <b>1-0D</b> to <b>1-1D</b> . ....                            | S29 |
| <b>Supplementary Table 9.</b> Calculated Gibbs free energies of each structure in unit cell with zero-<br>point energy correction and entropy correction at 378 K. ....                               | S29 |

## Supplementary Methods

**Single crystal X-ray diffraction (SXRd):** SXRd analyses of samples were performed on a Rigaku XtaLab Pro diffractometer equipped with a Mo K $\alpha$  radiation source. The temperature of sample was controlled with a continuous cold N<sub>2</sub> gas flow. The data of **1-0D** and **1-1D** were collected with one sample in the following order: the data of **1-0D** was collected at 278 K, then the crystal was in-situ heated to 366 K and maintained for 2 h, after which the SC-XRD of **1-1D** were performed at 372 K. The crystal data of **1-3D** were collected at 273 K. The structures were solved by a direct method and refined via full-matrix least-squares on  $F^2$  using the SHELX program<sup>1</sup> with anisotropic thermal parameters for all non-hydrogen atoms. The hydrogen atoms were geometrically added and refined by the riding model. The structures of [Co<sup>II</sup>(eg)<sub>2</sub>( $\mu$ -SO<sub>4</sub>)]<sub>n</sub> and {[Cu<sup>II</sup>(eg)]<sub>2</sub>( $\mu$ -SO<sub>4</sub>)<sub>2</sub>]<sub>n</sub> were refined with TWIN and BASF instructions because the twin domains formed during the symmetry-breaking structural transformations.

**Powder X-ray diffraction (PXRD):** PXRD was recorded on a PANalytical diffractometer with Cu K $\alpha$  radiation equipped with a TTK450 accessory in a temperature range from 273 K to 473 K at an interval of 25 K in a vacuum condition. The sample was stabilized at each temperature point for 30 min before measurement. The time-dependent reverse structural transformation was monitored by immersing the sample of **1-3D** in a mixed solvent of eg and acetone ( $v/v = 1/8$ ) for different time.

**Theoretical calculations:** In order to investigate formation process from **1-0D** to **1-1D**, we performed first-principle calculation using the Vienna Ab-initio Simulation Package (VASP).<sup>2</sup> The generalized gradient approximation (GGA)<sup>3</sup> with the Perdew-Burke-Ernzerhof (PBE) is

employed to describe all exchange and correlation effects. The vdW interaction is accounted using DFT-D3 corrections.<sup>4,5</sup> The projector augmented wave (PAW) method<sup>6,7</sup> is used to describe the electrons-ionic interactions. A cutoff energy of 820 eV was chosen for the plane-wave basis to ensure the precision of calculations. Brillouin zone is sampled by a  $3 \times 3 \times 1$  k-point grid. The relaxation of the electronic degrees of freedom is assumed to be converged when the total energy changes between the two electronic optimization steps is smaller than  $1 \times 10^{-5}$  eV, and the forces below 0.02 eV/Å for ions are used as the criterion for relaxation convergence. The calculated structures are in excellent agreement with experiment (Supplementary Table 8). The structures are optimized followed by frequency calculations. Gibbs free energies (Supplementary Table 9) are computed by  $G = E + ZPE - TS$ , where  $E$  is electronic energy,  $ZPE$  is zero-point energy,  $S$  is entropy,  $T$  is temperature and we use 378 K to match experimental condition. Since each primitive cell contains four Zn-motif, the energies reported are divided by four to represent the energetics change per Zn-motif.

**Supplementary Table 1.** Crystal data of **1-0D**, **1-1D**, **1-3D**, and **1-0D** (regained).

| Compound                                             | <b>1-0D</b>                                             | <b>1-1D</b><br>(right-hand)                             | <b>1-1D</b><br>(left-hand)                               | <b>1-3D</b>                                              | <b>1-0D</b><br>(regained)                                  |
|------------------------------------------------------|---------------------------------------------------------|---------------------------------------------------------|----------------------------------------------------------|----------------------------------------------------------|------------------------------------------------------------|
| Empirical formula                                    | C <sub>6</sub> H <sub>18</sub> O <sub>10</sub> SZn      | C <sub>4</sub> H <sub>12</sub> O <sub>8</sub> SZn       | C <sub>4</sub> H <sub>12</sub> O <sub>8</sub> SZn        | C <sub>2</sub> H <sub>6</sub> O <sub>6</sub> SZn         | C <sub>6</sub> H <sub>18</sub> O <sub>10</sub> SZn         |
| Formula weight                                       | 347.63                                                  | 285.57                                                  | 285.57                                                   | 223.50                                                   | 347.63                                                     |
| Temperature/K                                        | 293(2)                                                  | 372(3)                                                  | 372(1)                                                   | 270(2)                                                   | 292(2)                                                     |
| Crystal color                                        | colorless                                               | colorless                                               | colorless                                                | colorless                                                | colorless                                                  |
| Crystal system                                       | monoclinic                                              | orthorhombic                                            | orthorhombic                                             | monoclinic                                               | monoclinic                                                 |
| Space group                                          | <i>P</i> 2 <sub>1</sub> / <i>c</i>                      | <i>P</i> 2 <sub>1</sub> 2 <sub>1</sub> 2 <sub>1</sub>   | <i>P</i> 2 <sub>1</sub> 2 <sub>1</sub> 2 <sub>1</sub>    | <i>P</i> 2 <sub>1</sub>                                  | <i>P</i> 2 <sub>1</sub> / <i>c</i>                         |
| <i>a</i> /Å                                          | 8.7864(4)                                               | 6.4536(5)                                               | 6.4759(7)                                                | 10.0682(5)                                               | 8.7665(5)                                                  |
| <i>b</i> /Å                                          | 7.6102(3)                                               | 9.8866(6)                                               | 9.8926(10)                                               | 9.9679(4)                                                | 7.5918(4)                                                  |
| <i>c</i> /Å                                          | 19.3284(10)                                             | 15.1208(9)                                              | 15.1211(19)                                              | 12.7621(6)                                               | 19.2946(12)                                                |
| $\alpha$ /°                                          | 90                                                      | 90                                                      | 90                                                       | 90                                                       | 90                                                         |
| $\beta$ /°                                           | 99.475(5)                                               | 90                                                      | 90                                                       | 90.093(4)                                                | 99.387(6)                                                  |
| $\gamma$ /°                                          | 90                                                      | 90                                                      | 90                                                       | 90                                                       | 90                                                         |
| Volume/Å <sup>3</sup>                                | 1274.79(10)                                             | 964.77(11)                                              | 968.7(2)                                                 | 1280.79(11)                                              | 1266.93(13)                                                |
| <i>Z</i>                                             | 4                                                       | 4                                                       | 4                                                        | 8                                                        | 4                                                          |
| Dcalc. / mg·m <sup>-3</sup>                          | 1.811                                                   | 1.966                                                   | 1.958                                                    | 2.318                                                    | 1.823                                                      |
| <i>2θ</i> range /°                                   | 7.214 to<br>59.422                                      | 8.008 to<br>59.65                                       | 6.844 to<br>57.194                                       | 7.556 to<br>59.462                                       | 6.862 to<br>56.384                                         |
| Reflections collected                                | 15216                                                   | 8028                                                    | 5978                                                     | 12623                                                    | 6495                                                       |
| Independent reflections                              | 3251                                                    | 2437                                                    | 2102                                                     | 5776                                                     | 2804                                                       |
| <i>R</i> (int)                                       | 0.0739                                                  | 0.0428                                                  | 0.0498                                                   | 0.0356                                                   | 0.0684                                                     |
| Completeness                                         | 99.2%                                                   | 99.4%                                                   | 99.7%                                                    | 98.8%                                                    | 99.8%                                                      |
| Data/restraints/parameters                           | 3251/18/182                                             | 2437/12/139                                             | 2102/12/136                                              | 5776/25/385                                              | 2804/18/181                                                |
| Goodness-of-fit on <i>F</i> <sup>2</sup>             | 0.999                                                   | 1.021                                                   | 1.069                                                    | 0.997                                                    | 1.012                                                      |
| Final <i>R</i> indices<br>[ <i>I</i> >2σ( <i>I</i> ) | <i>R</i> <sub>1</sub> = 0.0407<br>$\omega R_2$ = 0.1037 | <i>R</i> <sub>1</sub> = 0.0279<br>$\omega R_2$ = 0.0632 | <i>R</i> <sub>1</sub> = 0.0421<br>$\omega R_2$ = 0.0951  | <i>R</i> <sub>1</sub> = 0.0285<br>$\omega R_2$ = 0.0623  | <i>R</i> <sub>1</sub> = 0.0576<br>$\omega R_2$ = 0.1504    |
| <i>R</i> indexes (all data)                          | <i>R</i> <sub>1</sub> = 0.0492<br>$\omega R_2$ = 0.1092 | <i>R</i> <sub>1</sub> = 0.0318<br>$\omega R_2$ = 0.0643 | <i>R</i> <sub>1</sub> = 0.0531,<br>$\omega R_2$ = 0.0981 | <i>R</i> <sub>1</sub> = 0.0325,<br>$\omega R_2$ = 0.0640 | <i>R</i> <sub>1</sub> = 0.0677<br>$\omega R_2$ =<br>0.1576 |
| Flack                                                | -----                                                   | 0.014(10)                                               | 0.01(2)                                                  | -0.010(7)                                                | -----                                                      |
| Largest diff. peak and hole / e Å <sup>-3</sup>      | 0.67/-0.94                                              | 0.38/-0.41                                              | 0.51/-0.76                                               | 0.54/-0.60                                               | 1.43/-1.56                                                 |

The SC-XRD analyses of **1-0D** and **1-1D** using the same crystal were successively performed

at 293 and 372 K. The high-quality single crystal of **1-0D** regained from **1-3D** confirms the reversibility of giant SCSC transformation.

**Supplementary Table 2.** The volumetric shrinkage and weight loss in typical crystalline materials that undergoes reversible solid-state transformations.

| Compounds                                                                                                                                                     | Volumetric shrinkage (%) | Weight loss (%) | Ref.             |
|---------------------------------------------------------------------------------------------------------------------------------------------------------------|--------------------------|-----------------|------------------|
| <b>Guest sorption</b>                                                                                                                                         |                          |                 |                  |
| ZnGGH-1·(DMF-H <sub>2</sub> O)                                                                                                                                | 16                       | 33              | 8                |
| Py <sub>6</sub> Mes                                                                                                                                           | 14                       | ~               | 9                |
| Li <sub>9</sub> K <sub>7</sub> W <sub>1</sub> Co <sub>10</sub> [H <sub>2</sub> P <sub>8</sub> W <sub>48</sub> O <sub>186</sub> ]·132H <sub>2</sub> O          | 31                       | 15              | 10               |
| [Cu(SiF <sub>6</sub> )(L) <sub>2</sub> ]·xMeOH·yH <sub>2</sub> O                                                                                              | 36                       | 14              | 11               |
| HYF (tripeptide)*                                                                                                                                             | 25                       | 60              | 12               |
| Ferritin *                                                                                                                                                    | 51                       | ~               | 13               |
| <b>Reaction between guests and hosts</b>                                                                                                                      |                          |                 |                  |
| [Co <sub>2</sub> (bipy) <sub>3</sub> (SO <sub>4</sub> ) <sub>2</sub> (H <sub>2</sub> O) <sub>2</sub> ] (bipy)(CH <sub>3</sub> OH)                             | 3.4                      | 13              | 14               |
| [{Fe <sup>III</sup> (Tp)(CN) <sub>3</sub> } <sub>4</sub><br>{Fe <sup>II</sup> (MeCN)(H <sub>2</sub> O) <sub>2</sub> } <sub>2</sub> ]·10H <sub>2</sub> O·2MeCN | 11                       | 21              | 15               |
| Cu <sub>2</sub> (OH)(C <sub>8</sub> H <sub>3</sub> O <sub>7</sub> S) (H <sub>2</sub> O)·2H <sub>2</sub> O                                                     | 20                       | 12              | 16               |
| CoCl <sub>2</sub> (1,4-dioxane) (H <sub>2</sub> O) <sub>2</sub>                                                                                               | 22                       | 14              | 17               |
| [Co <sub>1.5</sub> (tipb)(SO <sub>4</sub> )(pta) <sub>0.5</sub> ]·(DMF) <sub>1.75</sub>                                                                       | 3.9                      | 7.5             | 18               |
| [Mn(L)(H <sub>2</sub> O)] <sub>2</sub> [Mo(CN) <sub>7</sub> ]·2H <sub>2</sub> O                                                                               | 5.8                      | 5.8             | 19               |
| <b>[Zn<sup>II</sup>(eg)<sub>3</sub>]SO<sub>4</sub></b>                                                                                                        | <b>50</b>                | <b>36</b>       | <b>This work</b> |
| <b>[Cu<sup>II</sup>(eg)<sub>3</sub>]SO<sub>4</sub></b>                                                                                                        | <b>50</b>                | <b>36</b>       | <b>This work</b> |

\* The hyper-expansion of the lattice damages the single-crystal feature of these crystals composed of biomolecules.

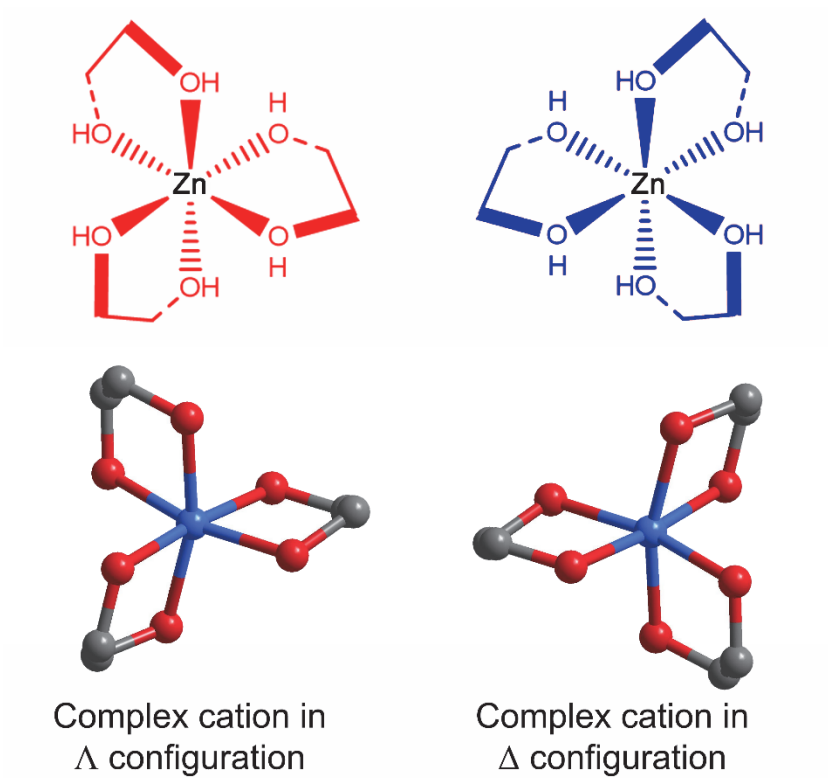

**Supplementary Fig. 1. The complex cation of  $[\text{Zn}^{\text{II}}(\text{eg})_3]^{2+}$  in  $\Lambda$  and  $\Delta$  configuration.**



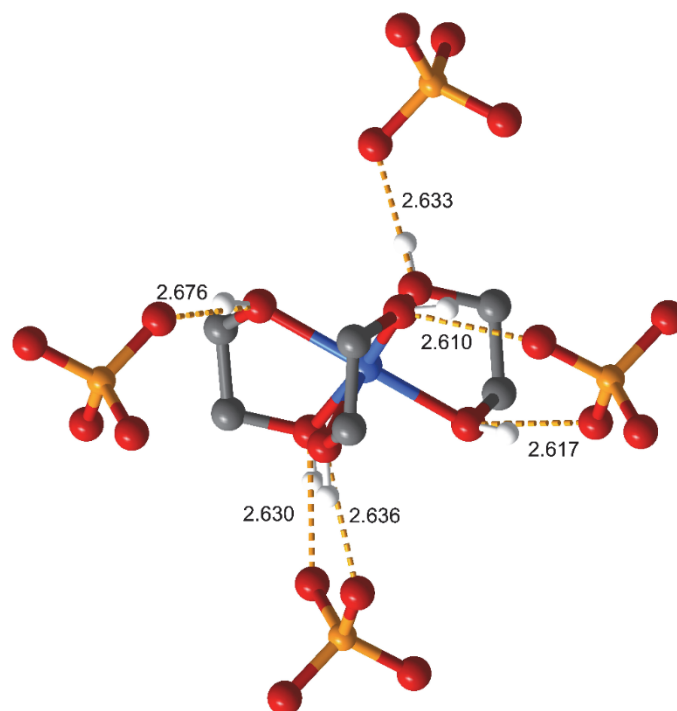

**Supplementary Fig. 2. The strong hydrogen bond interactions between the complex cation and sulfates in the compound of 1-0D.**

**Supplementary Table 3. Distance (Å) and angles (°) of the O–H···O hydrogen bonds in 1-0D.**

| D–H   | d(D···A) | ∠DHA   | A                      |
|-------|----------|--------|------------------------|
| O1–H1 | 2.610    | 157.26 | O9 [2-x, 1-y, 1-z]     |
| O2–H2 | 2.636    | 165.73 | O8 [x, y, z]           |
| O3–H3 | 2.629    | 159.27 | O7 [x, y, z]           |
| O4–H4 | 2.676    | 167.10 | O10 [1-x, 1-y, 1-z]    |
| O5–H5 | 2.633    | 168.50 | O10 [x, 1.5-y, -0.5+z] |
| O6–H6 | 2.617    | 162.02 | O8 [2-x, 1-y, 1-z]     |

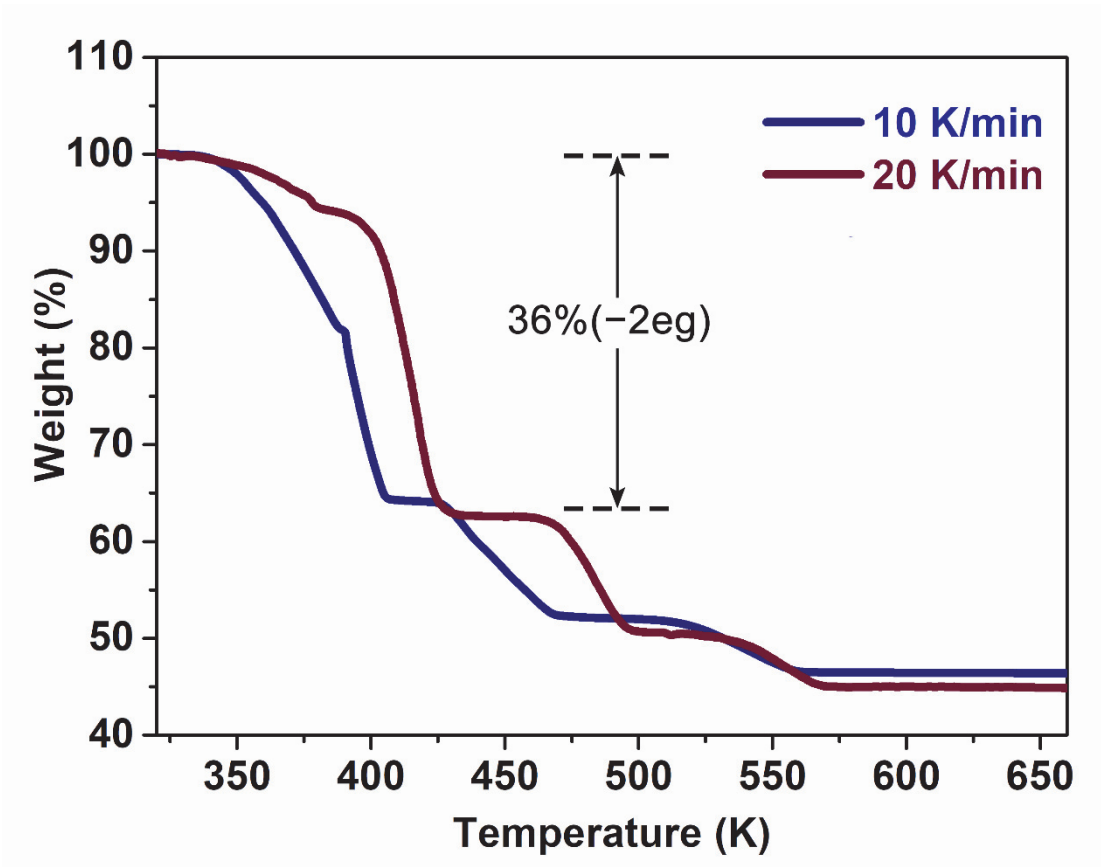

Supplementary Fig. 3. The TG curve of compound 1-0D at different heating rates. The first-step weight loss is largely suppressed when the heating rate is faster than 10 K/min.

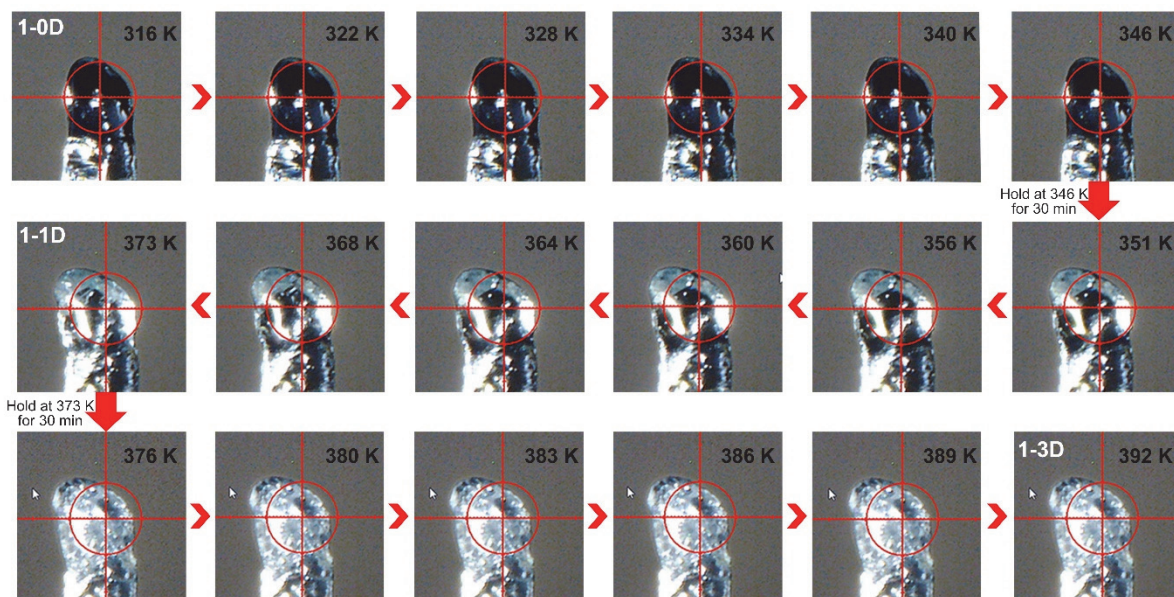

**Supplementary Fig. 4. The time-lapse photographs of the crystals before, during and after the transformations from 1-0D to 1-1D, and further to 1-3D. The crystalline shape of the sample retained during the phase transition, eliminating the possibility of crystal dissolution and regrowth during structural transformation.**

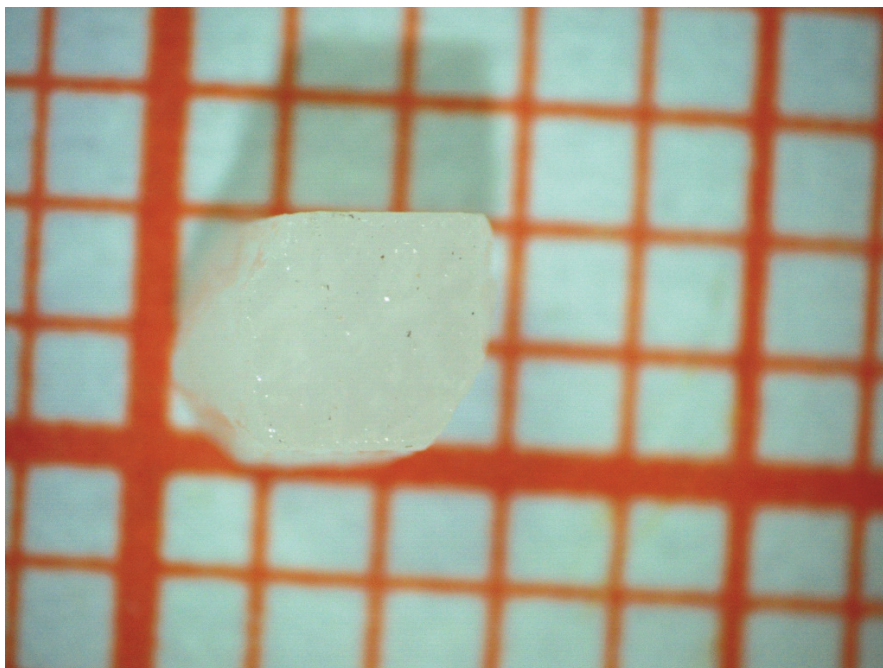

**Supplementary Fig. 5. The large single crystal of 1-1D prepared by heating 1-0D at 366 K for 2 h. The individual single crystal was used for CD measurements.**

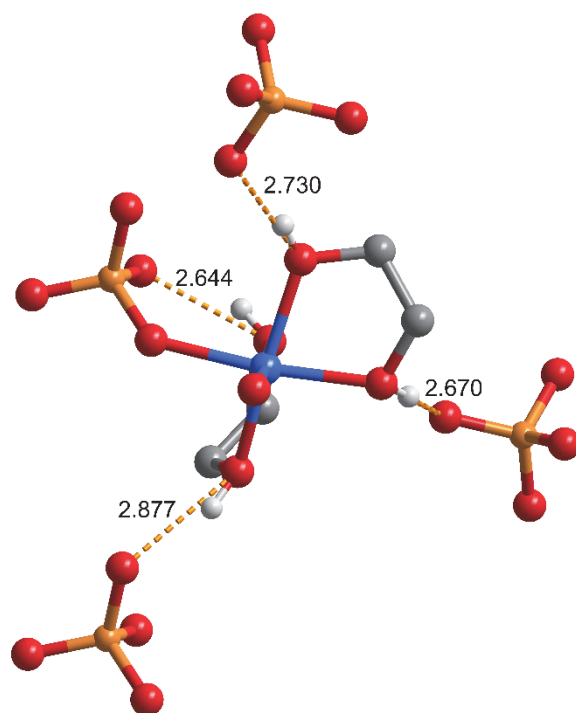

**Supplementary Fig. 6. The strong hydrogen bond interactions between the complex cation and sulfates in the compound of 1-1D.**

**Supplementary Table 4. Distance (Å) and angles (°) of the O–H···O hydrogen bonds in 1-1D.**

| D–H   | d(D···A) | ∠DHA   | A                        |
|-------|----------|--------|--------------------------|
| O1–H1 | 2.877    | 160.57 | O5 [-0.5+x, 1.5-y, 1-z]  |
| O2–H2 | 2.644    | 131.01 | O7 [1-x, -0.5+y, 1.5-z]  |
| O3–H3 | 2.669    | 165.20 | O8 [1+x, y, z]           |
| O4–H4 | 2.730    | 170.73 | O6 [0.5+x, 1.5-y, 1.5-z] |

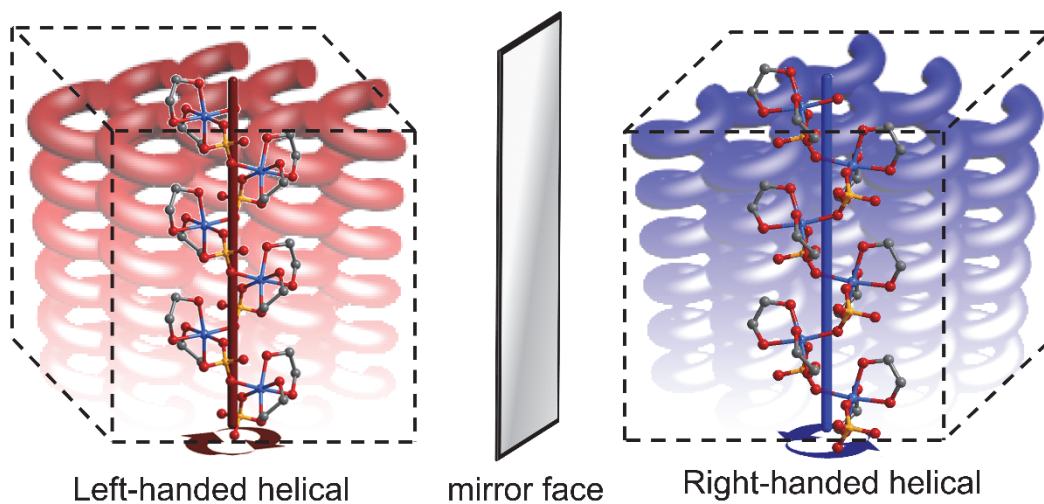

**Supplementary Fig. 7. The helices with opposite handedness in the racemic crystals of 1-1D.** The helices in each individual single crystal manifest the same handedness.

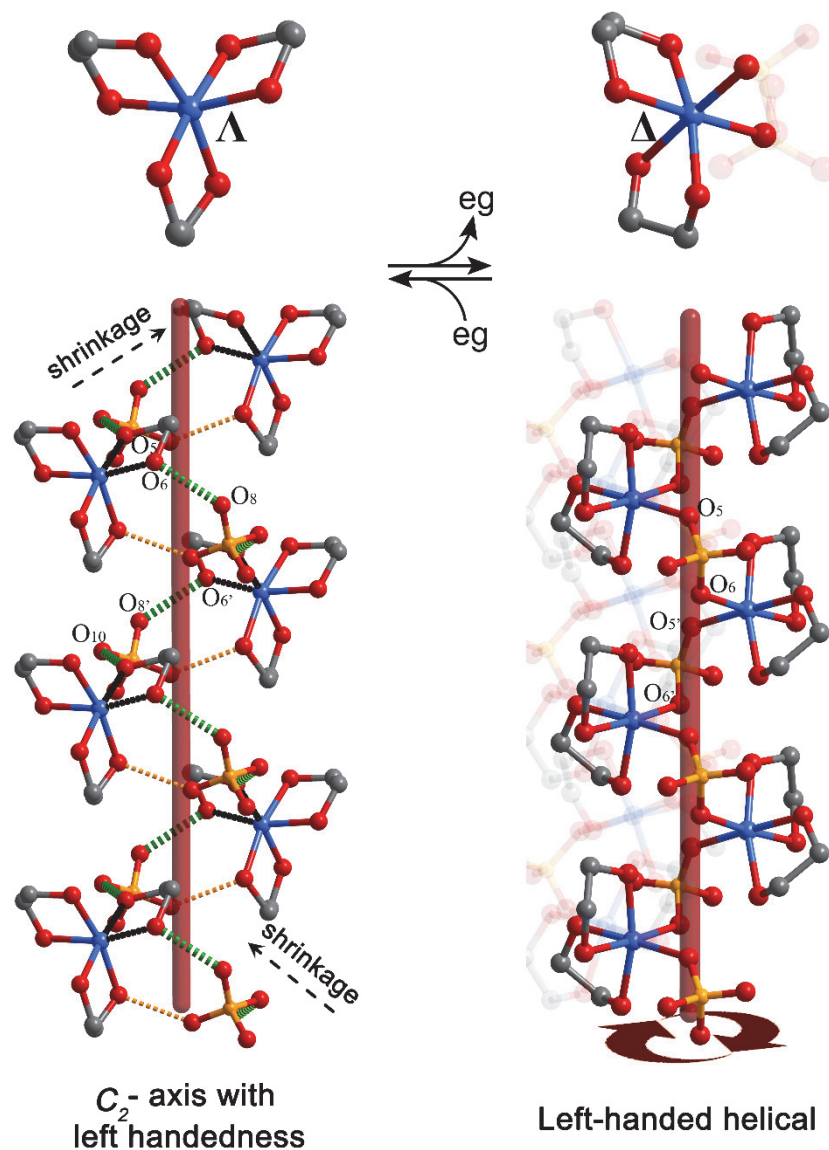

Supplementary Fig. 8. The twisted  $\Delta$  conformation of complex cations in the 1-0D are converted into identical *cis*- $\Delta$  configuration in the 1-1D with left handedness.

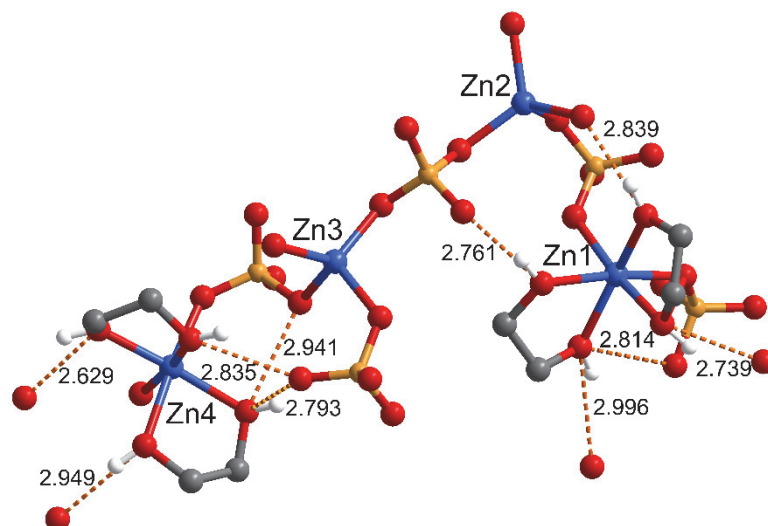

**Supplementary Fig. 9. The strong hydrogen bond interactions between the complex cation and sulfates in the compound of 1-3D.**

**Supplementary Table 5. Distance (Å) and angles (°) of the O–H···O hydrogen bonds in 1-3D.**

| D–H   | d(D···A) | ∠DHA   | A                    |
|-------|----------|--------|----------------------|
| O1–H1 | 2.839    | 154.61 | O11[2-x, -0.5+y, -z] |
| O2–H2 | 2.739    | 150.28 | O24[x, y, z]         |
| O3–H3 | 2.996    | 140.18 | O14[1-x, 0.5+y, 1-z] |
| O3–H3 | 2.814    | 121.03 | O20[2-x, 0.5+y, 1-z] |
| O4–H4 | 2.761    | 165.81 | O14[x, y, 1+z]       |
| O5–H5 | 2.793    | 130.96 | O19[-1+x, y, 1+z]    |
| O5–H5 | 2.941    | 108.52 | O21[x, y, 1+z]       |
| O6–H6 | 2.949    | 172.06 | O18[1-x, 0.5+y, 2-z] |
| O7–H7 | 2.835    | 125.87 | O19[-1+x, y, 1+z]    |
| O8–H8 | 2.629    | 141.50 | O10[-1+x, y, 2+z]    |

The strong hydrogen bond interactions in both the compound **1-0D**, **1-1D** and **1-3D** fasten the crystal lattice and then guarantee the single crystal nature during the giant SCSC transformation.



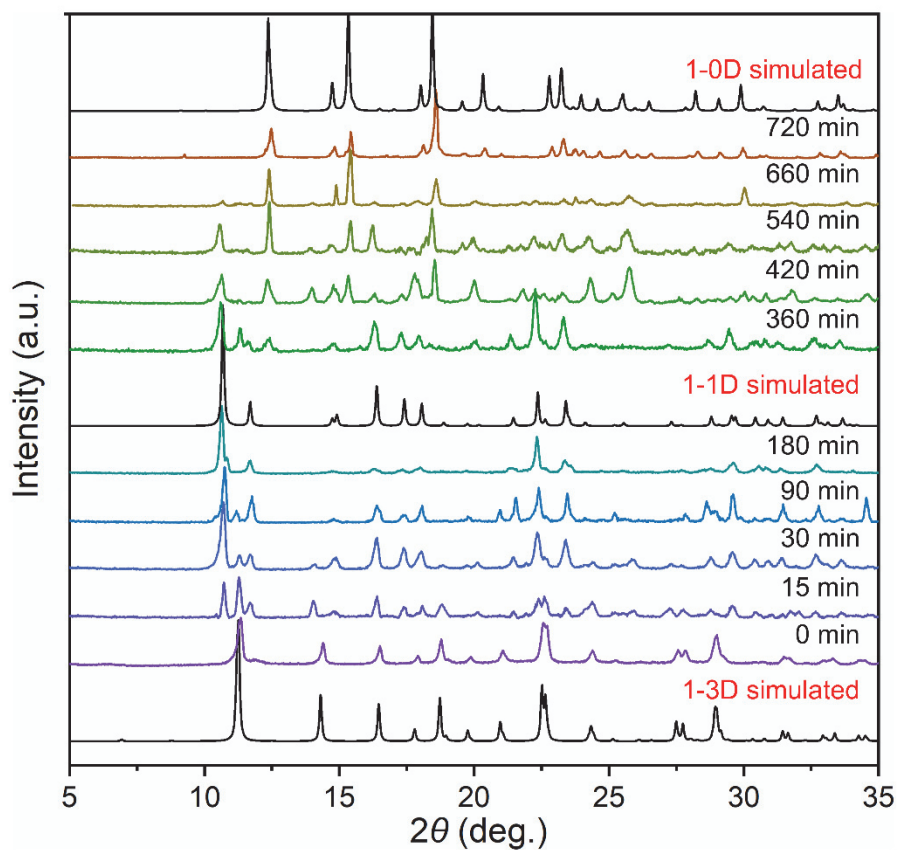

**Supplementary Fig. 10. The reversibility of 1-3D to 1-1D and further to 1-0D monitored by the in-situ PXRD.** The peaks that denote to the structure of **1-1D** and **1-0D** appear after 180 and 720 min in the acetone solution of eg, respectively, verifying the reversibility of two-step structural transformation. Notably, the time consumption for the structural transition from **1-3D** to **1-1D**, and further to **1-0D** depends on the size and quality of the sample.

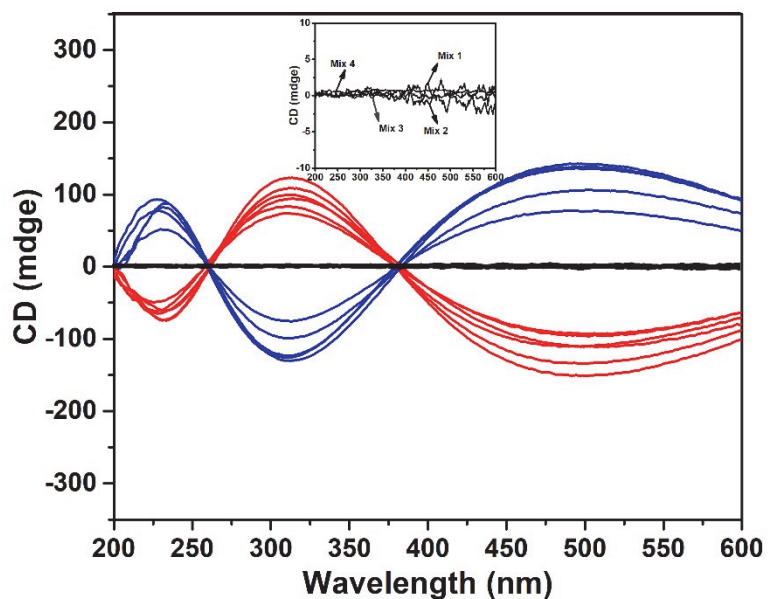

**Supplementary Fig. 11. The CD spectra of individual single crystals and powder crystals.**

The number of individual single crystals with  $\Lambda$  molecular conformation (blue lines) tends to equate to that of  $\Delta$  molecular conformation (red lines). No distinct CD signal was detected in the powder crystals prepared from a lot of single crystals. These results suggest the bulk state of **1-1D** are racemic mixture that has equal amounts of left- and right-handed enantiomers.

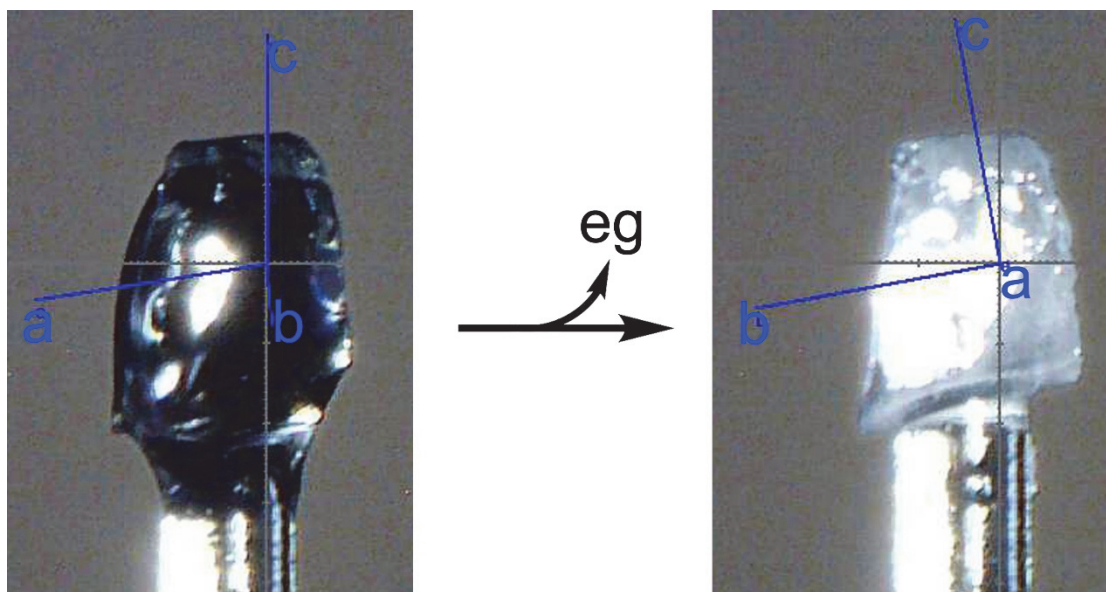

**Supplementary Fig. 12. The face index of single crystal of 1-0D (left) and 1-1D (right) performed on the same single crystal. The single crystal of 1-1D was prepared by heating 1-0D at 366 K for 2 h. During the first-step SCSC transformation, the crystallographic  $b$  axis in 1-0D is converted to crystallographic  $a$  axis in 1-1D that is parallel with the 1D coordination helices.**

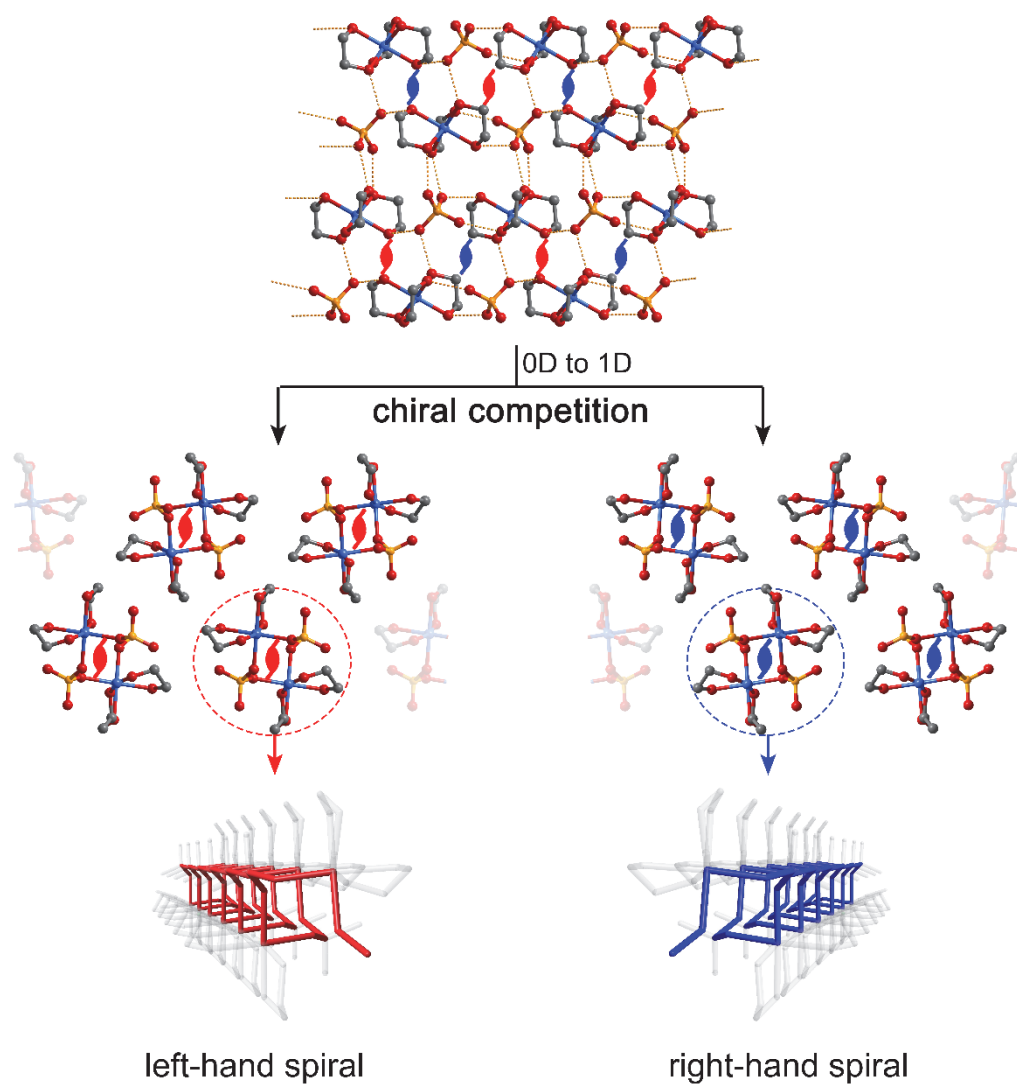

**Supplementary Fig. 13. The competition between the left- and right- handedness during the structural contraction leads to the single crystals of 1-1D with racemic structures.**

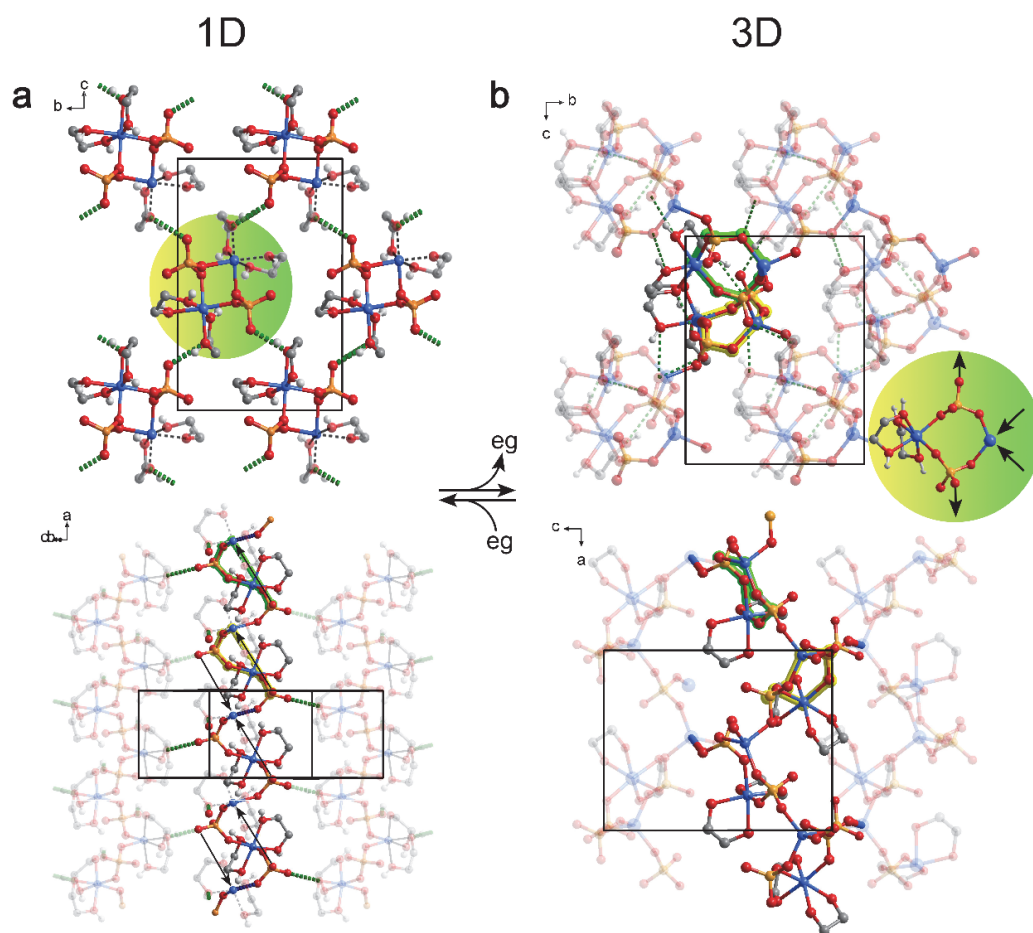

**Supplementary Fig. 14. Proposed mechanism for 1-1D (a) to 1-3D (b).** The black arrows in down panel indicate the O atoms from sulfate dianions in the adjacent thread shift toward the  $Zn^{II}$  metal centers and then form the circular building blocks (inset in the top panel b). The circular building block is composed of one hexacoordinated  $Zn^{II}$  ion and one tetracoordinated  $Zn^{II}$  bridged by two sulfate anions. It provides two O coordination atoms and two  $Zn^{II}$  coordination sites to further connect the other four building blocks around. The dashed green lines denote the intermolecular hydrogen-bond interactions. In the top panel of a, the eg ligands in transparency are eliminated upon heating the crystal to 410 K.

**Supplementary Table 6.** Crystal data of [Co<sup>II</sup>(eg)<sub>3</sub>]SO<sub>4</sub> and [Co<sup>II</sup>(eg)<sub>2</sub>(μ-SO<sub>4</sub>)<sub>n</sub>].

| Compound                                           | [Co <sup>II</sup> (eg) <sub>3</sub> ]SO <sub>4</sub>     | [Co <sup>II</sup> (eg) <sub>2</sub> (μ-SO <sub>4</sub> ) <sub>n</sub> ] |
|----------------------------------------------------|----------------------------------------------------------|-------------------------------------------------------------------------|
| Empirical formula                                  | C <sub>6</sub> H <sub>18</sub> O <sub>10</sub> SCo       | C <sub>4</sub> H <sub>12</sub> O <sub>8</sub> SCo                       |
| Formula weight                                     | 341.19                                                   | 279.13                                                                  |
| Temperature/K                                      | 298(2)                                                   | 298(2)                                                                  |
| Crystal color                                      | dark-purple                                              | purple                                                                  |
| Crystal system                                     | monoclinic                                               | orthorhombic                                                            |
| Space group                                        | <i>P</i> 2 <sub>1</sub> / <i>c</i>                       | <i>P</i> 2 <sub>1</sub> 2 <sub>1</sub> 2 <sub>1</sub>                   |
| <i>a</i> /Å                                        | 8.8234(5)                                                | 6.4943(4)                                                               |
| <i>b</i> /Å                                        | 7.5950(4)                                                | 9.9222(5)                                                               |
| <i>c</i> /Å                                        | 19.2916(9)                                               | 15.1193(8)                                                              |
| $\alpha$ /°                                        | 90                                                       | 90                                                                      |
| $\beta$ /°                                         | 99.448(5)                                                | 90                                                                      |
| $\gamma$ /°                                        | 90                                                       | 90                                                                      |
| Volume/Å <sup>3</sup>                              | 1275.27(12)                                              | 974.25(9)                                                               |
| <i>Z</i>                                           | 4                                                        | 4                                                                       |
| D <sub>calc</sub> /mg·m <sup>-3</sup>              | 1.777                                                    | 1.903                                                                   |
| $\mu$ /mm <sup>-1</sup>                            | 1.552                                                    | 1.994                                                                   |
| <i>F</i> <sub>000</sub>                            | 708.0                                                    | 572.0                                                                   |
| 2 $\theta$ range /°                                | 7.12 to 52.742                                           | 7.5 to 59.608                                                           |
| Reflections collected                              | 9904                                                     | 7334                                                                    |
| Independent reflections                            | 2593                                                     | 2462                                                                    |
| <i>R</i> (int)                                     | 0.0263                                                   | 0.0371                                                                  |
| Completeness                                       | 99.5%                                                    | 99.5%                                                                   |
| Data/restraints/parameters                         | 2593/18/181                                              | 2462/12/140                                                             |
| Goodness-of-fit on <i>F</i> <sup>2</sup>           | 1.082                                                    | 1.056                                                                   |
| Final <i>R</i> indices [ <i>I</i> >2σ( <i>I</i> )  | <i>R</i> <sub>1</sub> = 0.0294,<br>$\omega R_2$ = 0.0754 | <i>R</i> <sub>1</sub> = 0.0307,<br>$\omega R_2$ = 0.0800                |
| <i>R</i> indexes (all data)                        | <i>R</i> <sub>1</sub> = 0.0326,<br>$\omega R_2$ = 0.0770 | <i>R</i> <sub>1</sub> = 0.0323,<br>$\omega R_2$ = 0.0807                |
| Flack                                              | -----                                                    | 0.48(2)                                                                 |
| Largest diff. peak and hole / e<br>Å <sup>-3</sup> | 1.22/-0.33                                               | 0.42/-0.52                                                              |

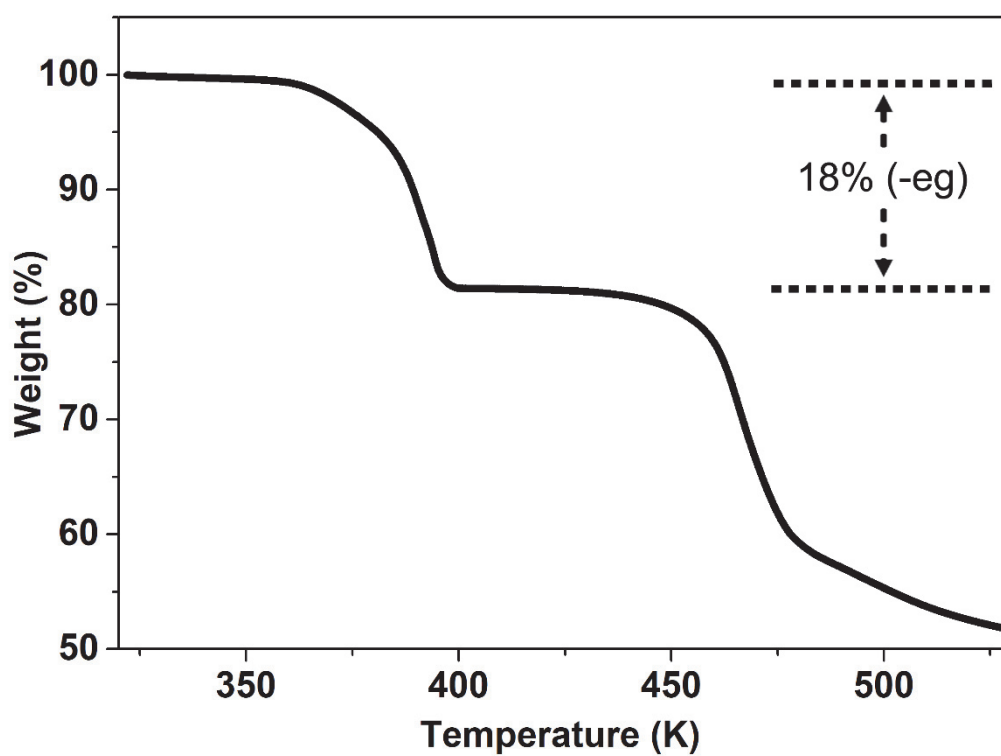

**Supplementary Fig. 15.** The TG curve of compound  $[\text{Co}^{\text{II}}(\text{eg})_3]\text{SO}_4$ . Only the first-step structural transformation (0D to 1D) that corresponds to elimination of one third of eg molecules was found in the analog of  $\text{Ni}^{\text{II}}$  and  $\text{Co}^{\text{II}}$ .

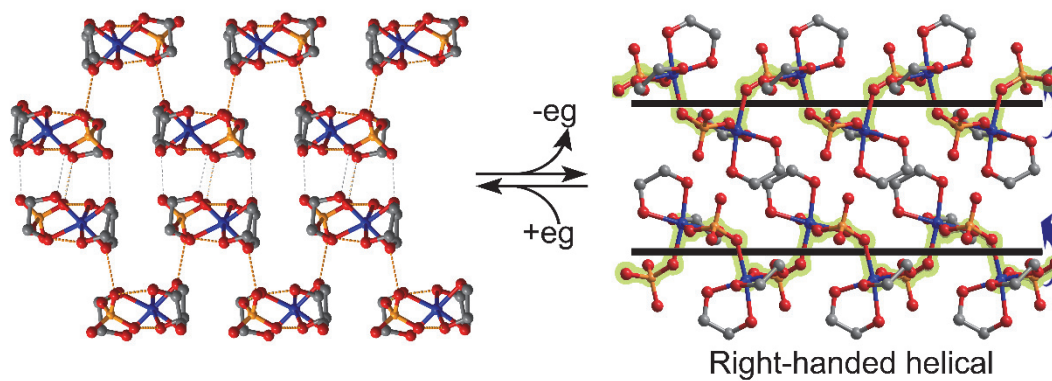

Supplementary Fig. 16. The structural transformation of 0D [Co<sup>II</sup>(eg)<sub>3</sub>]SO<sub>4</sub> to 1D {[Co<sup>II</sup>(eg)<sub>2</sub>(μ-SO<sub>4</sub>)<sub>2</sub>]<sub>n</sub>.



**Supplementary Table 7.** Crystal data of  $[\text{Cu}^{\text{II}}(\text{eg})_3]\text{SO}_4$  and  $\{[\text{Cu}^{\text{II}}(\text{eg})]_2(\mu\text{-SO}_4)_2\}_n$ .

| Compound                                                     | $[\text{Cu}^{\text{II}}(\text{eg})_3]\text{SO}_4$ | $\{[\text{Cu}^{\text{II}}(\text{eg})]_2(\mu\text{-SO}_4)_2\}_n$ |
|--------------------------------------------------------------|---------------------------------------------------|-----------------------------------------------------------------|
| Empirical formula                                            | $\text{C}_6\text{H}_{18}\text{CuO}_{10}\text{S}$  | $\text{C}_4\text{H}_{12}\text{Cu}_2\text{O}_{12}\text{S}_2$     |
| Formula weight                                               | 345.80                                            | 443.34                                                          |
| Temperature/K                                                | 298 (2)                                           | 298 (2)                                                         |
| Crystal color                                                | Light-blue                                        | Light-green                                                     |
| Crystal system                                               | monoclinic                                        | monoclinic                                                      |
| Space group                                                  | $P2_1/n$                                          | $P2_1$                                                          |
| $a/\text{\AA}$                                               | 10.1321(7)                                        | 5.1583(4)                                                       |
| $b/\text{\AA}$                                               | 8.9661(5)                                         | 16.3247(14)                                                     |
| $c/\text{\AA}$                                               | 14.3022(8)                                        | 7.5800(6)                                                       |
| $\alpha/^\circ$                                              | 90                                                | 90                                                              |
| $\beta/^\circ$                                               | 104.400(6)                                        | 97.013(7)                                                       |
| $\gamma/^\circ$                                              | 90                                                | 90                                                              |
| Volume/ $\text{\AA}^3$                                       | 1258.48(13)                                       | 633.52(9)                                                       |
| Z                                                            | 4                                                 | 2                                                               |
| Dcalc. / $\text{mg}\cdot\text{m}^{-3}$                       | 1.825                                             | 2.324                                                           |
| $\mu/\text{mm}^{-1}$                                         | 1.944                                             | 3.747                                                           |
| $F_{000}$                                                    | 716.0                                             | 444.0                                                           |
| $2\theta$ range / $^\circ$                                   | 7.434 to 59.088                                   | 7.366 to 50.046                                                 |
| Reflections collected                                        | 11601                                             | 4948                                                            |
| Independent reflections                                      | 3168                                              | 2130                                                            |
| $R(\text{int})$                                              | 0.0268                                            | 0.0520                                                          |
| Completeness                                                 | 99.7%                                             | 98.5%                                                           |
| Data/restraints/parameters                                   | 3168/18/181                                       | 2130/60/188                                                     |
| Goodness-of-fit on $F^2$                                     | 1.096                                             | 1.135                                                           |
| Final $R$ indices [ $I > 2\sigma(I)$ ]                       | $R_1 = 0.0258,$<br>$\omega R_2 = 0.0663$          | $R_1 = 0.0752,$<br>$\omega R_2 = 0.2016$                        |
| $R$ indexes (all data)                                       | $R_1 = 0.0290,$<br>$\omega R_2 = 0.0675$          | $R_1 = 0.0760,$<br>$\omega R_2 = 0.2022$                        |
| Flack                                                        | -----                                             | 0.43(6)                                                         |
| Largest diff. peak and hole /<br>$\text{e}\ \text{\AA}^{-3}$ | 0.58/-0.44                                        | 3.66/-1.09                                                      |

Notably, the crystal twinning was detected in the structures  $[\text{Co}^{\text{II}}(\text{eg})_2(\mu\text{-SO}_4)]_n$  and  $\{[\text{Cu}^{\text{II}}(\text{eg})]_2(\mu\text{-SO}_4)_2\}_n$  because of the competition between the left- and right-handedness of enantiomeric structures during symmetry-breaking structural transformation<sup>20,21</sup>.

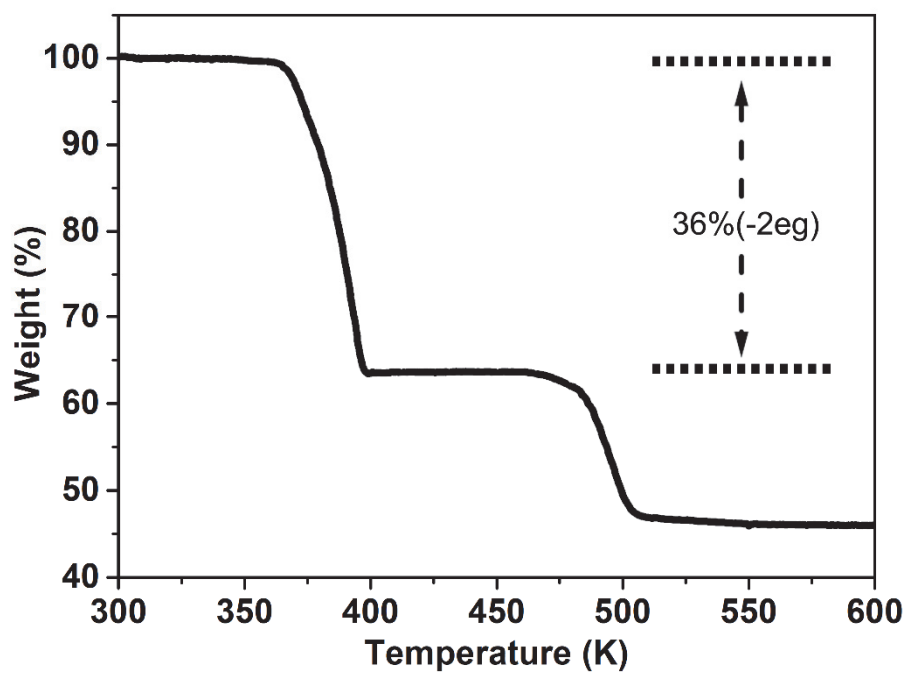

**Supplementary Fig. 17.** The TG curve of compound  $[\text{Cu}^{\text{II}}(\text{eg})_3]\text{SO}_4$ . Two thirds of eg ligands are collectively removed by heating the crystal to 395 K.

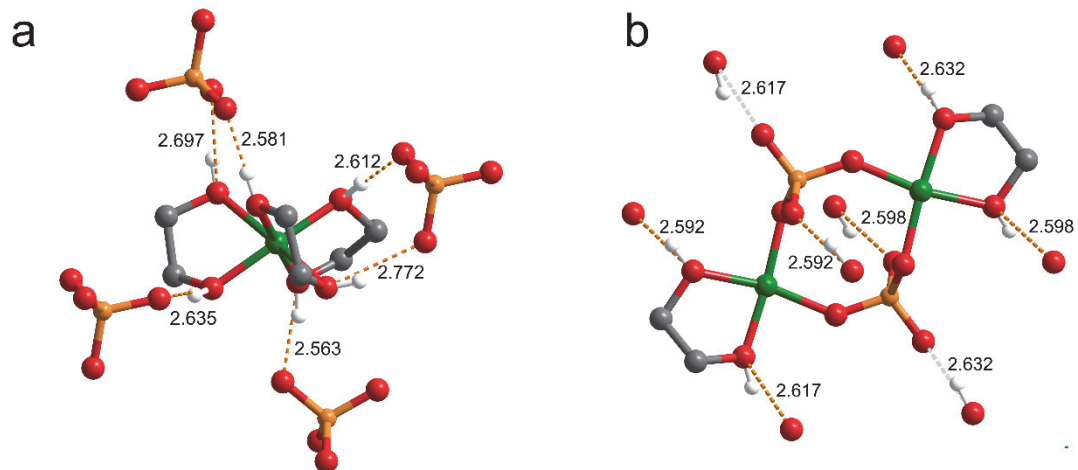

**Supplementary Fig. 18.** The building block in 0D  $[\text{Cu}^{\text{II}}(\text{eg})_3]\text{SO}_4$  (a) and 1D  $\{[\text{Cu}^{\text{II}}(\text{eg})_2(\mu\text{-SO}_4)_2]_n\}$  (b). The sulfate dianions and complex cations are connected through strong hydrogen bonds.

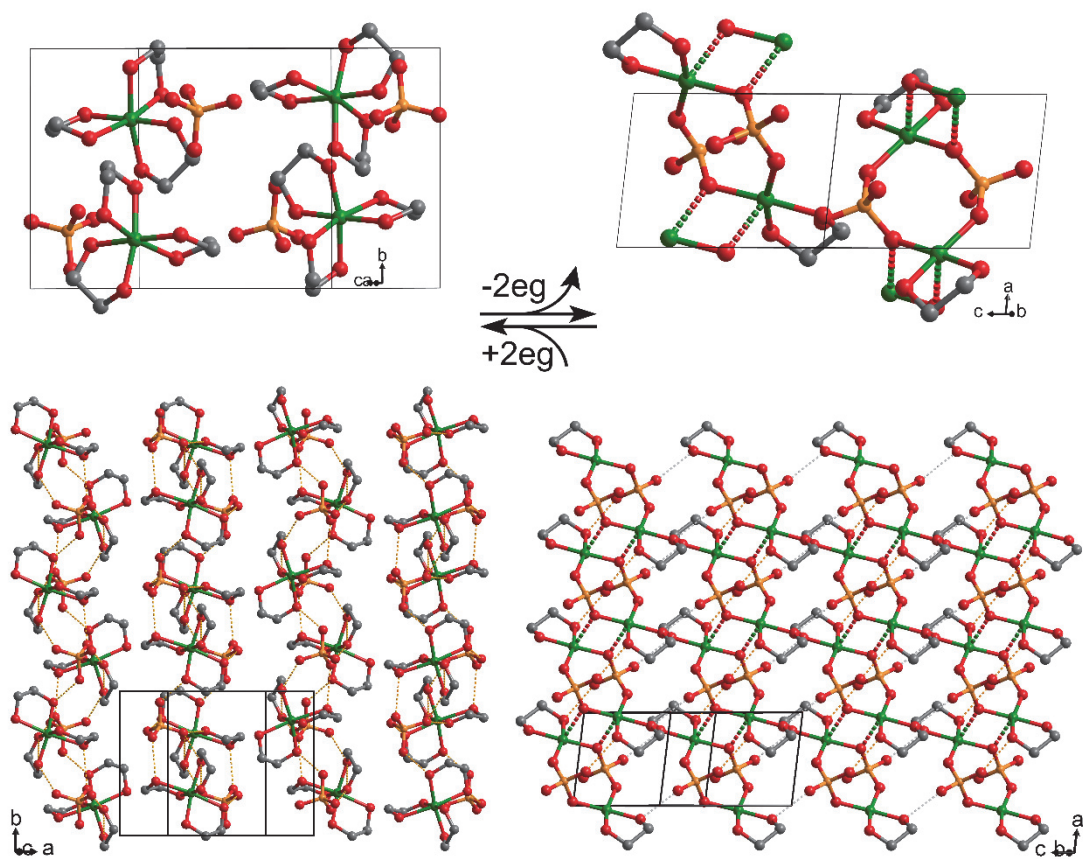

Supplementary Fig. 19. The structural transformation from 0D  $[\text{Cu}^{\text{II}}(\text{eg})_3]\text{SO}_4$  to 1D  $\{[\text{Cu}^{\text{II}}(\text{eg})]_2(\mu\text{-SO}_4)_2\}_n$ .

**Supplementary Table 8.** Comparison between experimental (exp.) and calculated (calc.)lattice parameters of the structures from **1-0D** to **1-1D**.

|              | $\alpha$ (°) | $\beta$ (°) | $\gamma$ (°) | a(Å) | b(Å) | c(Å)  |
|--------------|--------------|-------------|--------------|------|------|-------|
| 1-0D (calc.) | 90.0         | 99.1        | 90.0         | 8.78 | 7.61 | 19.23 |
| 1-0D (exp.)  | 90.0         | 99.5        | 90.0         | 8.79 | 7.61 | 19.32 |
| INT1 (calc.) | 91.4         | 94.8        | 88.8         | 7.97 | 8.54 | 19.39 |
| INT2 (calc.) | 90.2         | 104.7       | 89.9         | 8.04 | 8.45 | 19.38 |
| INT3 (calc.) | 90.0         | 90.1        | 90.0         | 6.45 | 9.75 | 15.81 |
| 1-1D (calc.) | 90.0         | 90.0        | 90.0         | 6.41 | 9.95 | 15.08 |
| 1-1D (exp.)  | 90.0         | 90.0        | 90.0         | 6.45 | 9.89 | 15.12 |

**Supplementary Table 9.** Calculated Gibbs free energies of each structure in unit cell with zero-point energy correction and entropy correction at 378 K.

| structure       | chemical formula of unit cell                                                        | Gibbs free energy (eV) |
|-----------------|--------------------------------------------------------------------------------------|------------------------|
| 1-0D            | 4·[Zn (C <sub>2</sub> H <sub>6</sub> O <sub>2</sub> ) <sub>3</sub> ]SO <sub>4</sub>  | -763.05                |
| INT1            | 4·[Zn (C <sub>2</sub> H <sub>6</sub> O <sub>2</sub> ) <sub>3</sub> ] SO <sub>4</sub> | -758.97                |
| INT2            | 4·[Zn (C <sub>2</sub> H <sub>6</sub> O <sub>2</sub> ) <sub>2</sub> ] SO <sub>4</sub> | -550.32                |
| INT3            | 4·[Zn (C <sub>2</sub> H <sub>6</sub> O <sub>2</sub> ) <sub>2</sub> ] SO <sub>4</sub> | -550.92                |
| 1-1D            | 4·[Zn (C <sub>2</sub> H <sub>6</sub> O <sub>2</sub> ) <sub>2</sub> ] SO <sub>4</sub> | -553.52                |
| ethylene glycol | C <sub>2</sub> H <sub>6</sub> O <sub>2</sub>                                         | -52.34                 |

## Supplementary References

- 1 Sheldrick, G. M. *et al.* Crystal structure refinement with SHELXL. *Acta Cryst. C.* **71**, 3-8 (2015).
- 2 Hafner, J. *et al.* Ab-initio simulations of materials using VASP: density-functional theory and beyond. *J. Comput. Chem.* **29** (13), 2044–2078 (2008).
- 3 Perdew, J. P. *et al.* Generalized gradient approximation made simple. *Phys. Rev. Lett.* **77** (18), 3865-3868 (1996).
- 4 Grimme, S. *et al.* A consistent and accurate ab initio parametrization of density functional dispersion correction (DFT-D) for the 94 elements H-Pu. *J. Chem. Phys.* **132**, 154104 (2010).
- 5 Grimme, S. *et al.* Effect of the damping function in dispersion corrected density functional theory. *J. Comput. Chem.* **32**, 1456–1465 (2011).
- 6 Kresse, G. *et al.* From ultrasoft pseudopotentials to the projector augmented-wave method. *Phys. Rev. B: Condens. Matter. Mater. Phys.* **59**, 1758–1775 (1999).
- 7 Blochl, P. E. *et al.* Projector augmented-wave method. *Phys. Rev. B: Condens. Matter. Mater. Phys.* **50**, 17953–17979 (1994).
- 8 Katsoulidis, A. P. *et al.* Chemical control of structure and guest uptake by a conformationally mobile porous material. *Nature* **565**, 213-217 (2019).
- 9 Yamagishi, H. *et al.* Self-assembly of lattices with high structural complexity from a geometrically simple molecule. *Science* **361**, 1242-1246 (2018).
- 10 Zhan, C. *et al.* A metamorphic inorganic framework that can be switched between eight single-crystalline states. *Nat. Commun.* **8**, 14185 (2017).
- 11 Song, B.-Q. *et al.* Reversible Switching between Nonporous and Porous Phases of a New SIFSIX Coordination Network Induced by a Flexible Linker Ligand. *J. Am. Chem. Soc.* **142**, 6896-6901 (2020).
- 12 Piotrowska, R. *et al.* Mechanistic insights of evaporation-induced actuation in supramolecular crystals. *Nat. Mater.* **20**, 403-409 (2021).
- 13 Zhang, L. *et al.* Hyperexpandable, self-healing macromolecular crystals with integrated

- polymer networks. *Nature* **557**, 86-91 (2018).
- 14 Bradshaw, D. *et al.* Reversible Concerted Ligand Substitution at Alternating Metal Sites in an Extended Solid. *Science* **315**, 977-980 (2007).
- 15 Zhang, Y.-J., *et al.* Reversible Single-Crystal-to-Single-Crystal Transformation from Achiral Antiferromagnetic Hexanuclears to a Chiral Ferrimagnetic Double Zigzag Chain. *J. Am. Chem. Soc.* **131**, 7942-7943 (2009).
- 16 Xiao, B. *et al.* Chemically blockable transformation and ultrasensitive low-pressure gas adsorption in a non-porous metal organic framework. *Nat. Chem.* **1**, 289-294 (2009).
- 17 Duan, Z. *et al.* Crystal-to-Crystal Transformation from Antiferromagnetic Chains into a Ferromagnetic Diamondoid Framework. *J. Am. Chem. Soc.* **131**, 6934-6935 (2009).
- 18 Chen, Q. *et al.* A Controllable Gate Effect in Cobalt(II) Organic Frameworks by Reversible Structure Transformations. *Angew. Chem. Int. Ed.* **52**, 11550-11553 (2013).
- 19 Wu, D.-Q. *et al.* Reversible On–Off Switching of a Single-Molecule Magnet via a Crystal-to-Crystal Chemical Transformation. *J. Am. Chem. Soc.* **139**, 11714-11717 (2017).
- 20 Zhang, Y. *et al.* Ferroelectricity Induced by Ordering of Twisting Motion in a Molecular Rotor. *J. Am. Chem. Soc.* **134**, 11044-11049 (2012).
- 21 Phillips, A. E. & Fortes, A. D. Crossover between Tilt Families and Zero Area Thermal Expansion in Hybrid Prussian Blue Analogues. *Angew. Chem. Int. Ed.* **56**, 15950-15953 (2017).
